# Supplementary material for: Extraction of Phenol as Pollutant from Aqueous Effluents Using Hydrophobic Deep Eutectic Solvents
Source: MDPI journal article supplement (doi:10.3390/w15244289), 2023-12-15
Supplement: s1 [file s1]

# Extraction of Phenol as Pollutant from Aqueous Effluents Using Hydrophobic Deep Eutectic Solvents

Irfan Wazeer <sup>1,2</sup>, Hanee F. Hizaddin <sup>1,2,\*</sup>, Ng Xue Wen <sup>1,2</sup>, Lahssen El Blidi <sup>3</sup>, Mohd A. Hashim <sup>1,2</sup> and Mohamed K. Hadj-Kali <sup>3,\*</sup>

<sup>1</sup> Department of Chemical Engineering, Faculty of Engineering, Universiti Malaya, 50603 Kuala Lumpur, Malaysia; alihashim@um.edu.my (M.A.H)

<sup>2</sup> University of Malaya Centre for Ionic Liquids (UMCiL), Universiti Malaya, 50603 Kuala Lumpur, Malaysia

<sup>3</sup> Chemical Engineering Department, College of Engineering, King Saud University, P.O Box 800, Riyadh 11421, Saudi Arabia; lelblidi@ksu.edu.sa

\*Correspondence: hanee@um.edu.my (H.F.H); mhadjkali@ksu.edu.sa (M.K.H.K)

## List of Tables

Table S1. Comparison of phenolic compounds extraction efficiency by utilising VOCs, ILs and HDESs as extractants.

Table S2. Chemical structures of different chemicals investigated in this study.

Table S3. COSMO-RS screening results.

Table S1. Comparison of phenolic compounds extraction efficiency by utilising VOCs, ILs and HDESs as extractants

| Solvent | Analytes                                                                                                      | Extractant                                                                | Efficiency                                         | Refs. |
|---------|---------------------------------------------------------------------------------------------------------------|---------------------------------------------------------------------------|----------------------------------------------------|-------|
| VOCs    | Phenol in sebacic acid wastewater                                                                             | Aliquat-336                                                               | 96.3 %                                             | [1]   |
|         | Phenol in wastewater containing 6000 mg/l phenol and 5 % salts                                                | Octanol                                                                   | > 99 %                                             | [2]   |
|         | Phenol in aqueous solution                                                                                    | 50 % v/v mixture of tributyl phosphate and 2-Octanol                      | 99.9 %                                             | [3]   |
|         | Phenol in aqueous solution                                                                                    | Cumene                                                                    | 59.22 %                                            | [4]   |
|         | Phenol, p-chlorophenol, 2,4-dichlorophenol, 2,4,6-trichlorophenol, and pentachlorophenol in aqueous solutions | Tributyl phosphate                                                        | Around 85.94 %                                     | [5]   |
|         | Phenol, p-chlorophenol, 2,4-dichlorophenol, 2,4,6-trichlorophenol, and pentachlorophenol in aqueous solutions | 1-butyl-3-methylimidazolium tetrafluoroborate                             | Around 99.42 %                                     | [5]   |
| ILs     | Phenolic compounds from cashew and rice industrial wastewater                                                 | Phosphonium chloride [PC6C6C6C14][Cl]                                     | 100 %                                              | [6]   |
|         | Phenol from model oil                                                                                         | 1-ethyl-3-methyl imidazolium lactate                                      | 99.9 %                                             | [7]   |
|         | Phenols from oil mixtures                                                                                     | tetraethylammonium amino acid                                             | 99.0 %                                             | [8]   |
| HDESs   | 2-chlorophenol, 3-chlorophenol, 2,4-dichlorophenol from wastewater                                            | HBA: menthol<br>HBD: hexanoic acid, octanoic acid, decanoic acid, thymol. | > 94 % for all systems.                            | [9]   |
|         | 4-chlorophenol, 2,4-dichlorophenol, 2,4,6-trichlorophenol from wastewater                                     | DES composed of methyltrioctylammonium chloride and octanoic acid         | 90.8 % to 93.0 %                                   | [10]  |
|         | Phenol, o-cresol, 2-chlorophenol from water                                                                   | [Menthol: Octanoic acid] (1:1)<br>[Menthol: Decanoic acid] (1:1)          | Phenol: >70 %<br>o-cresol & 2-chlorophenol: > 80 % | [11]  |

Table S2. Chemical structures of different chemicals investigated in this study.

| Name          | Chemical structure                                                                   |
|---------------|--------------------------------------------------------------------------------------|
| Phenol        | 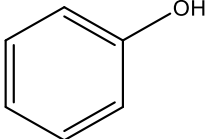    |
| TOPO          |    |
| 1-hexanol     |     |
| Menthol       |    |
| Thymol        |   |
| Decanoic acid |  |

Table S3. COSMO-RS screening results

| No | HBA                             | HBD                      | Molar ratio | C <sup>∞</sup> | S <sup>∞</sup> | PI <sup>∞</sup> |
|----|---------------------------------|--------------------------|-------------|----------------|----------------|-----------------|
| 1  | Benzoyltrifluoroacetone         | Triphenyl phosphate      | 2:1         | 1.98           | 128.58         | 254.43          |
| 2  |                                 |                          | 2:1         | 1.99           | 1.51           | 3.00            |
| 3  | Decanoic acid                   | Lidocaine                | 3:1         | 1.65           | 1.37           | 2.26            |
| 4  |                                 |                          | 4:1         | 1.48           | 1.37           | 2.04            |
| 5  |                                 | Octanoic acid            | 1:3         | 1.09           | 0.89           | 0.91            |
| 6  | Dodecanoic acid                 | Decanoic acid            | 1:2         | 0.99           | 8.13           | 8.11            |
| 7  |                                 | nonanoic acid            | 1:3         | 1.04           | 7.33           | 7.61            |
| 8  | Hydrocinnamic acid              | Decanoic acid            | 1:1         | 2.55           | 10.08          | 25.67           |
| 9  |                                 | Aliquat 336              | 7:3         | 6.36           | 51.72          | 328.95          |
| 10 |                                 | Lidocaine                | 5:5         | 3.95           | 6.69           | 26.44           |
| 11 |                                 | ibuprofen                | 7:3         | 1.26           | 20.62          | 25.97           |
| 12 |                                 | Proton Sponge®           | 7:3         | 1.23           | 46.69          | 57.39           |
| 13 |                                 | Octanoic acid            | 1:1         | 1.29           | 14.24          | 18.29           |
| 14 |                                 |                          | 1:2         | 1.23           | 10.67          | 13.05           |
| 15 | Menthol                         |                          | 1:1         | 1.18           | 14.77          | 17.42           |
| 16 |                                 | Decanoic acid            | 1:2         | 1.11           | 11.87          | 13.13           |
| 17 |                                 |                          | 1:3         | 1.07           | 10.58          | 11.35           |
| 18 |                                 | methyl-2,4-pentanediol   | 2:1         | 2.13           | 15.23          | 32.43           |
| 19 |                                 | 1-decanol                | 2:1         | 1.83           | 25.92          | 47.49           |
| 20 |                                 | Salicylic acid           | 4:1         | 1.29           | 7.56           | 9.73            |
| 21 |                                 | Propionic acid           | 1:1         | 1.40           | 9.41           | 13.17           |
| 22 |                                 | Formic acid              | 1:1         | 1.19           | 7.54           | 9.032           |
| 23 |                                 | Lidocaine                | 9:1         | 1.53           | 7.82           | 11.95           |
| 24 | Methyl anthranilate             | ibuprofen                | 9:1         | 1.27           | 30.58          | 38.82           |
| 25 |                                 | Proton Sponge®           | 9:1         | 1.24           | 53.01          | 65.50           |
| 26 |                                 | DL-menthol               | 9:1         | 1.52           | 40.84          | 62.07           |
| 27 | Methyltrioctylammonium          | Octanoic acid            | 1:2         | 6.73           | 36.95          | 248.79          |
| 28 | bromide                         | Decanoic acid            | 1:2         | 7.89           | 43.67          | 344.59          |
| 29 | Methyltrioctylammonium chloride | Octanoic acid            | 1:2         | 2.89           | 13.16          | 38.09           |
| 30 | Tetrabutyl ammonium             | Thymol                   | 1:2         | 5.79           | 14.48          | 83.81           |
| 31 | bromide                         | octanoic acid            | 1:2         | 9.55           | 32.59          | 311.41          |
| 32 | Thenoyltrifluoroacetone         | triphenyl phosphate      | 2:1         | 1.95           | 126.09         | 245.84          |
| 33 |                                 | methyl-2,4-pentanediol   | 2:1         | 1.24           | 3.31           | 4.0914          |
| 34 |                                 | 1-decanol                | 2:1         | 1.01           | 4.54           | 4.57            |
| 35 | Thymol                          | Trioctylphosphine oxide  | 1:1         | 6.70           | 138.02         | 925.35          |
| 36 |                                 | Decanoic acid            | 1:3         | 0.86           | 4.45           | 3.84            |
| 37 |                                 | Camphor                  | 1:1         | 1.68           | 8.91           | 14.96           |
| 38 |                                 | Methyl 4-hydroxybenzoate | 1:1         | 3.79           | 5.35           | 20.23           |

|    |                                 |                                |     |       |        |        |
|----|---------------------------------|--------------------------------|-----|-------|--------|--------|
| 39 | Trioctylmethylammonium chloride | butyl 4-hydroxybenzoate        | 1:2 | 2.38  | 3.08   | 7.35   |
| 40 |                                 |                                | 2:1 | 4.82  | 10.31  | 49.68  |
| 41 |                                 |                                | 1:1 | 4.29  | 8.06   | 34.63  |
| 42 |                                 |                                | 1:2 | 2.63  | 5.35   | 14.04  |
| 43 |                                 |                                | 1:3 | 1.87  | 3.69   | 6.90   |
| 44 |                                 |                                | 2:1 | 5.31  | 13.58  | 72.13  |
| 45 |                                 | isobutyl 4-hydroxybenzoate     | 1:1 | 3.87  | 5.85   | 22.61  |
| 46 |                                 |                                | 1:2 | 2.35  | 3.56   | 8.36   |
| 47 |                                 |                                | 1:3 | 1.67  | 2.36   | 3.94   |
| 48 |                                 |                                | 2:1 | 4.89  | 10.98  | 53.60  |
| 49 |                                 | 2-Ethylhexyl 4-hydroxybenzoate | 1:1 | 4.43  | 7.86   | 34.87  |
| 50 |                                 |                                | 1:2 | 2.55  | 5.40   | 13.76  |
| 51 |                                 |                                | 1:3 | 1.74  | 3.69   | 6.43   |
| 52 |                                 |                                | 2:1 | 5.48  | 13.12  | 71.79  |
| 53 |                                 | n-octyl 4-hydroxybenzoate      | 1:1 | 4.47  | 9.81   | 43.83  |
| 54 |                                 |                                | 1:2 | 2.56  | 7.14   | 18.27  |
| 55 |                                 |                                | 1:3 | 1.75  | 4.96   | 8.67   |
| 56 |                                 |                                | 1:4 | 1.78  | 3.34   | 5.95   |
| 57 |                                 |                                | 2:1 | 5.51  | 15.39  | 84.79  |
| 58 |                                 |                                | 2:1 | 5.48  | 28.20  | 154.51 |
| 59 |                                 | Decanoic acid                  | 1:1 | 4.66  | 20.91  | 97.39  |
| 60 |                                 |                                | 1:2 | 3.02  | 17.92  | 54.11  |
| 61 |                                 |                                | 2:1 | 6.06  | 26.03  | 157.74 |
| 62 |                                 | Ketoprofen                     | 1:1 | 5.35  | 20.13  | 107.59 |
| 63 |                                 |                                | 1:2 | 3.69  | 17.69  | 65.21  |
| 64 |                                 | Gemfibrozil                    | 1:2 | 3.08  | 16.58  | 51.15  |
| 65 |                                 |                                | 1:1 | 4.89  | 19.80  | 96.91  |
| 66 | Trioctylphosphine oxide         | Decanoic acid                  | 1:1 | 9.69  | 256.07 | 2483.2 |
| 67 |                                 | menthol                        | 1:1 | 14.89 | 215.75 | 3211.7 |
| 68 |                                 |                                | 1:2 | 5.66  | 195.19 | 1103.8 |
| 69 |                                 |                                | 1:3 | 3.88  | 135.83 | 527.64 |
| 70 |                                 |                                | 1:4 | 3.19  | 99.82  | 318.86 |
| 71 |                                 |                                | 1:5 | 2.78  | 80.29  | 222.77 |
| 72 |                                 | 1-hexanol                      | 1:1 | 18.39 | 186.14 | 3422.9 |
| 73 |                                 | 3,5-Di-tertbutylcatechol       | 1:1 | 5.69  | 80.45  | 458.24 |

## **List of Figures**

Figure S1. Capacity of HDESs at infinite dilution: A Two-Part Detailed Analysis.

Figure S2. Selectivity of HDESs at infinite dilution: A Two-Part Detailed Analysis

Figure S3. Performance index of HDESs at infinite dilution: A Two-Part Detailed Analysis.

Figure S4. GC calibration curve of naphthalene/phenol.

Figure S5. Viscosity of HDESs at different temperatures.

Figure S6. Density of HDESs at different temperatures.

Figure S7. FTIR analysis of TOPO:Thy HDES and its individual components.

Figure S8. FTIR analysis of TOPO:DecA HDES and its individual components.

Figure S9. FTIR analysis of TOPO:Hex HDES and its individual components.

Figure S10.  $^1\text{H}$  NMR spectra of TOPO:Hex HDES. The peak around 7.25 is the peak of chloroform.

Figure S11.  $^1\text{H}$  NMR spectra of TOPO:Thy HDES. The peak around 7.25 is the peak of chloroform.

Figure S12.  $^1\text{H}$  NMR spectra of TOPO:DecA HDES. The peak around 7.25 is the peak of chloroform.

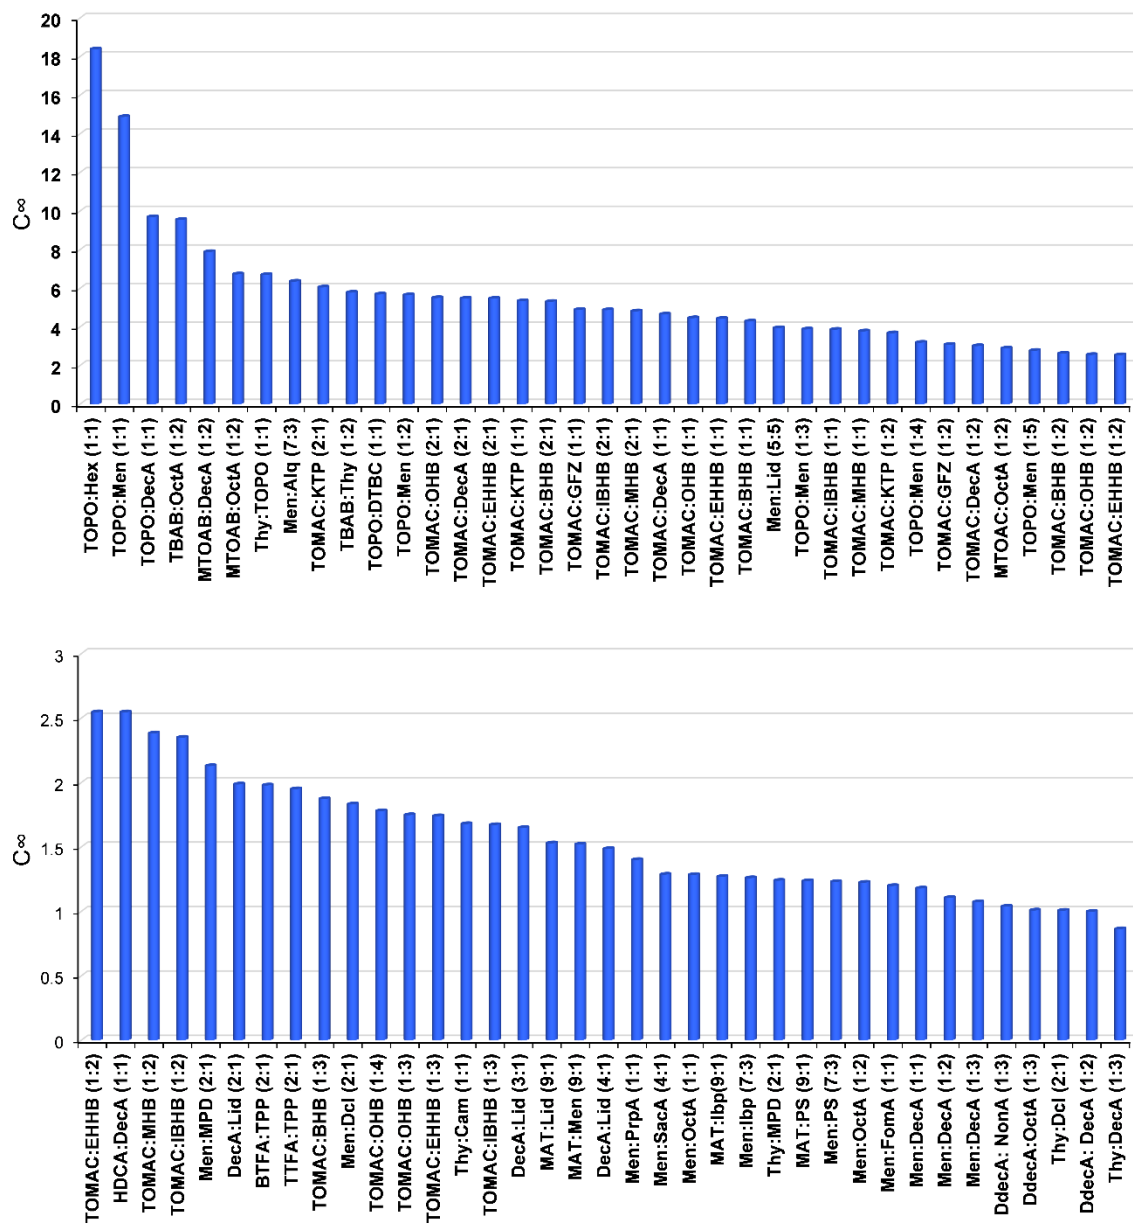

Figure S1. Capacity of HDESs at infinite dilution: A Two-Part Detailed Analysis.

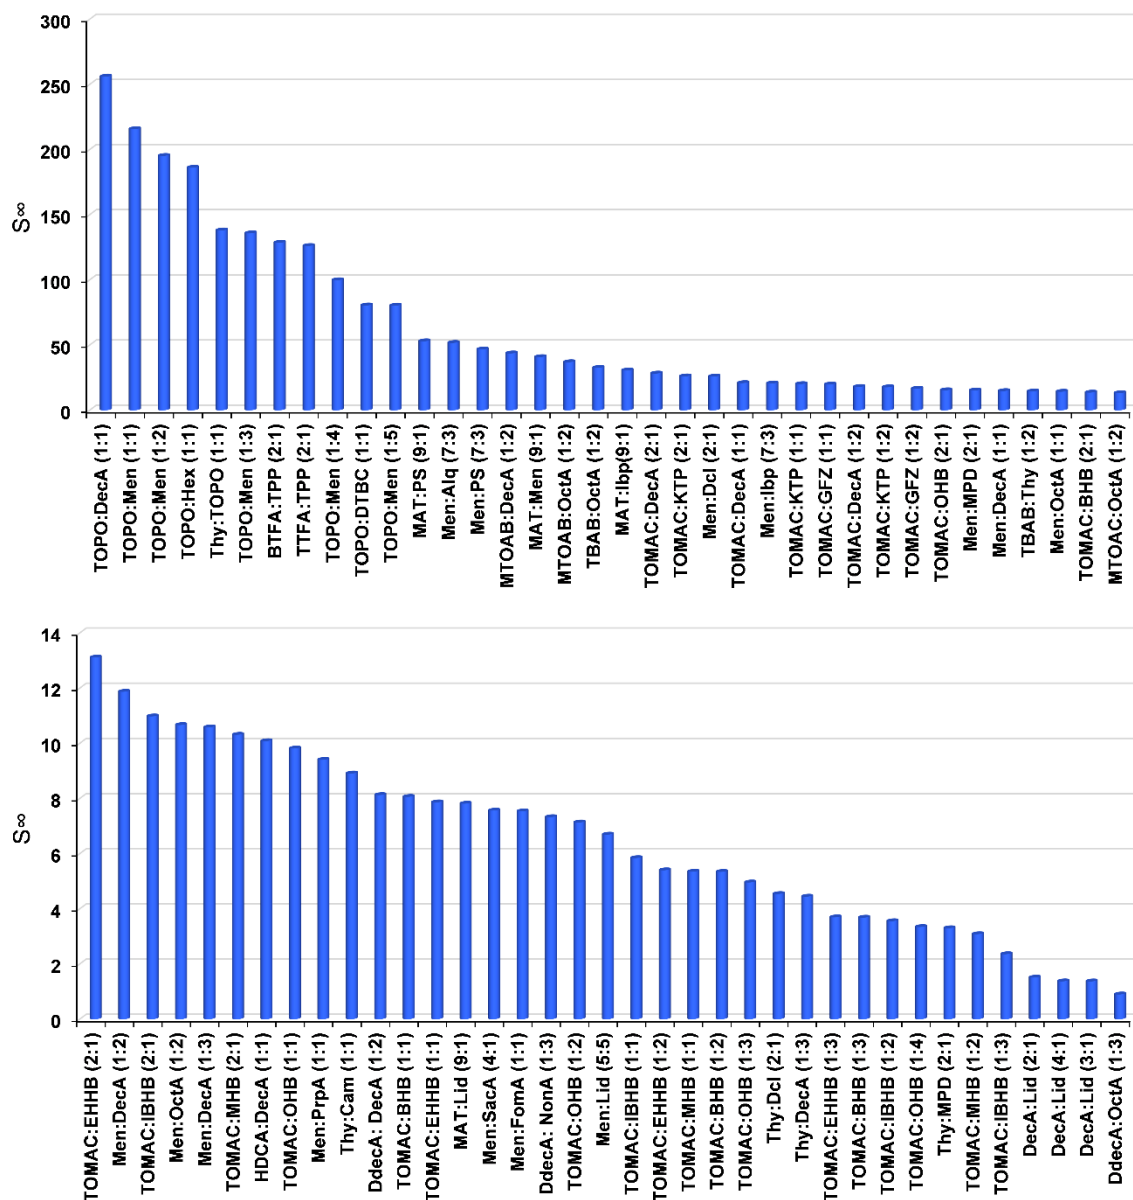

Figure S2. Selectivity of HDESSs at infinite dilution: A Two-Part Detailed Analysis.



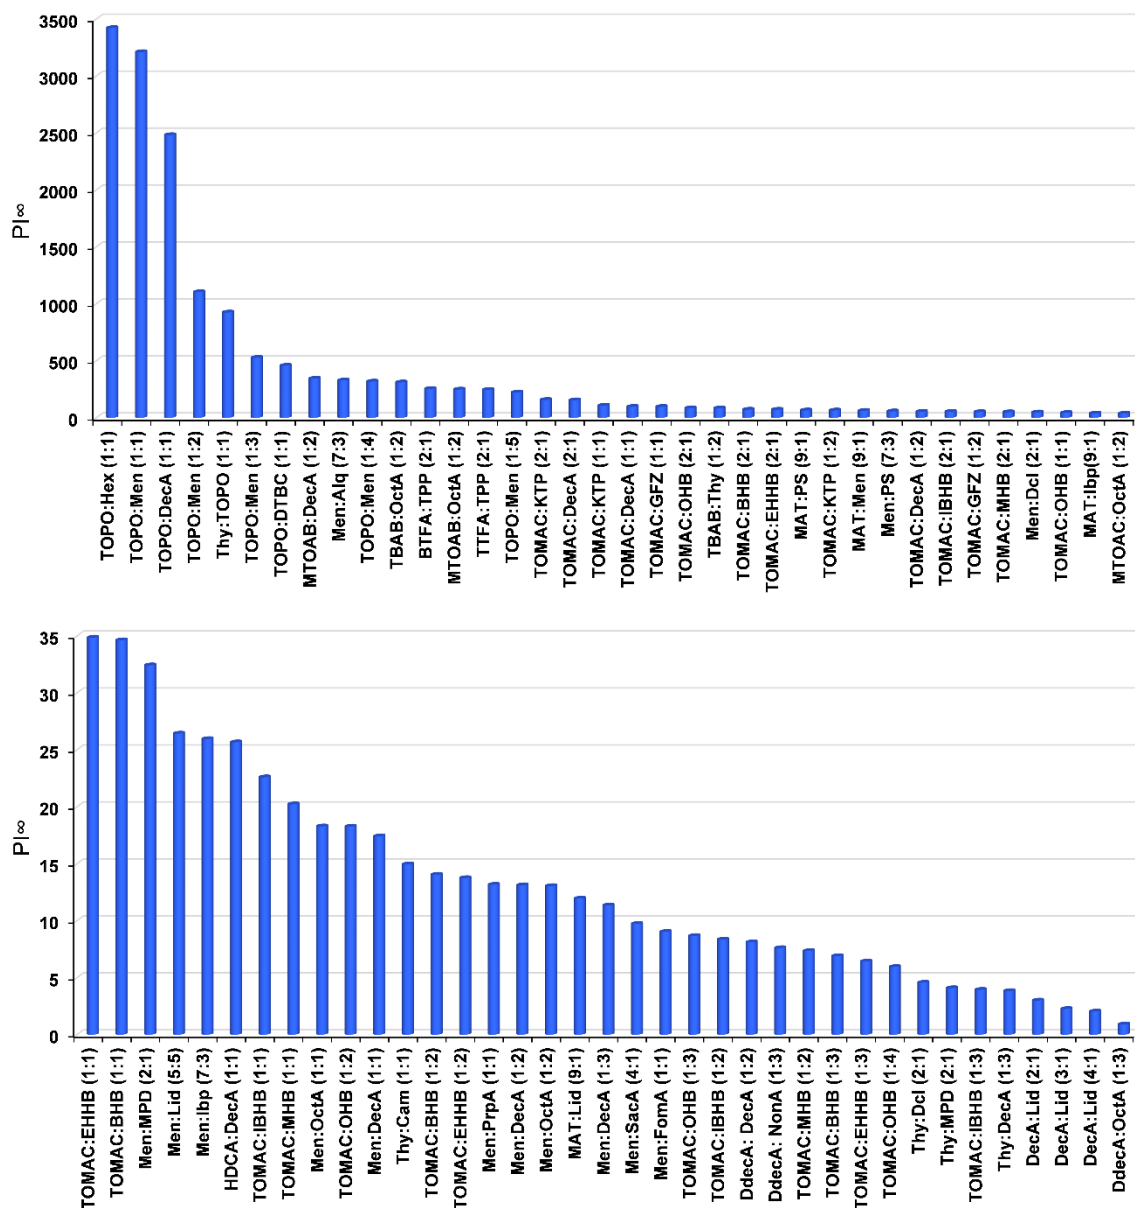

Figure S3. Performance index of HDESs at infinite dilution: A Two-Part Detailed Analysis.

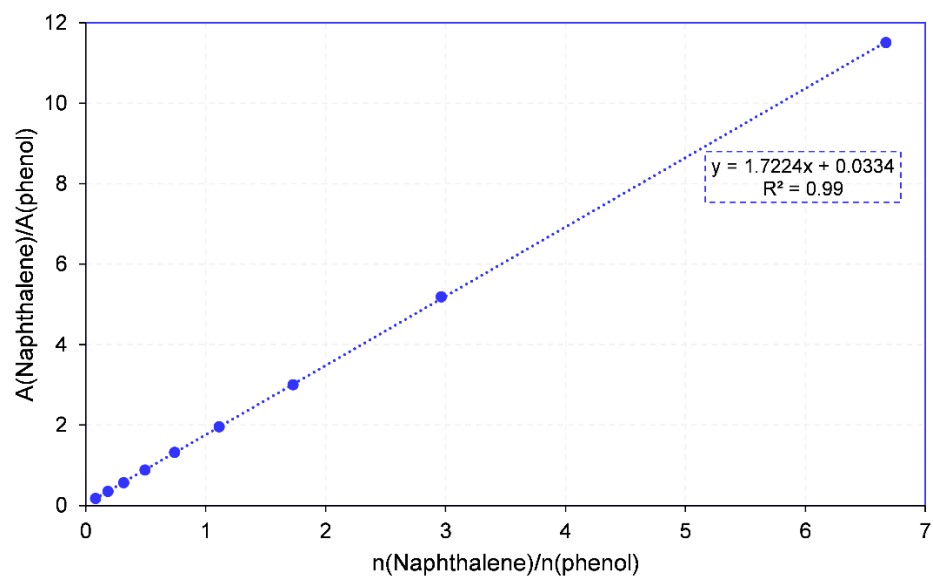

Figure S4. GC calibration curve of naphthalene/phenol.

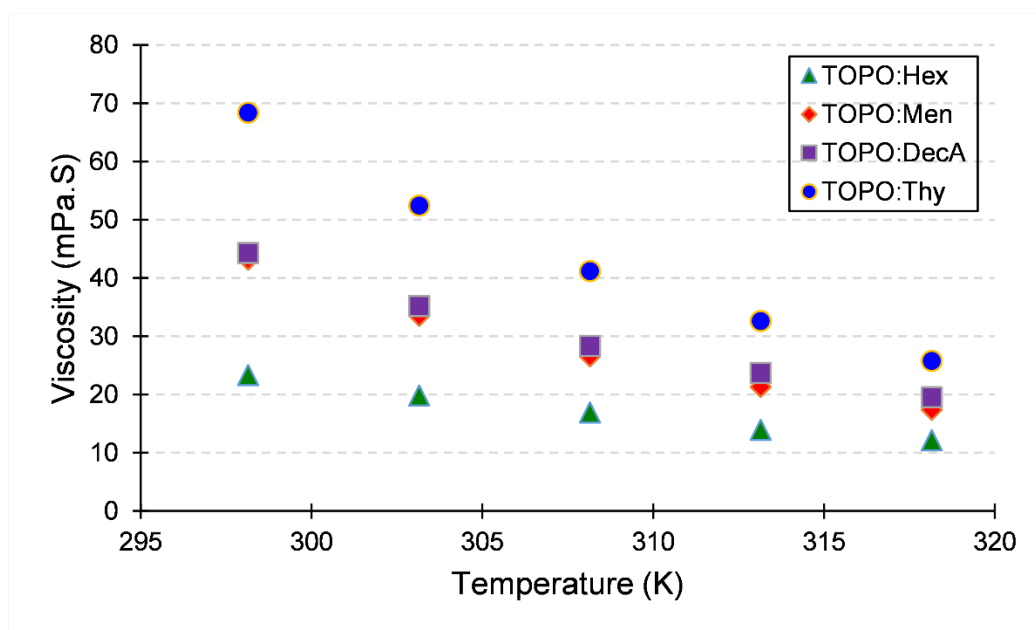

Figure S5. Viscosity of HDESs at different temperatures.

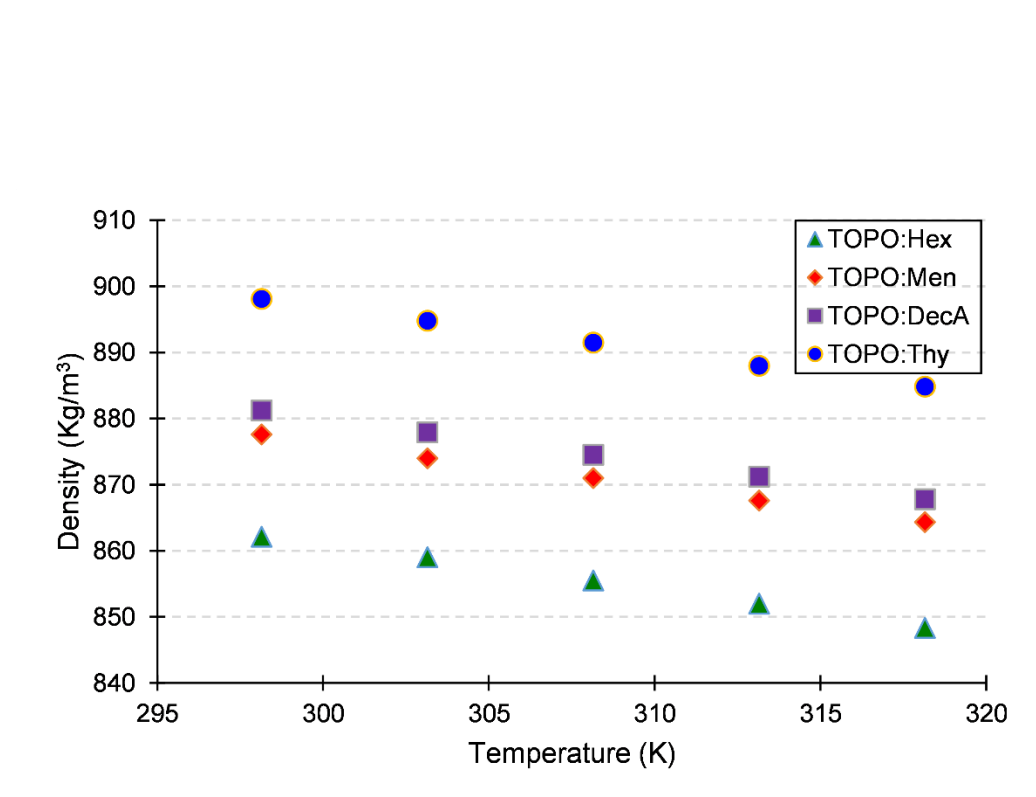

Figure S6. Density of HDESs at different temperatures.

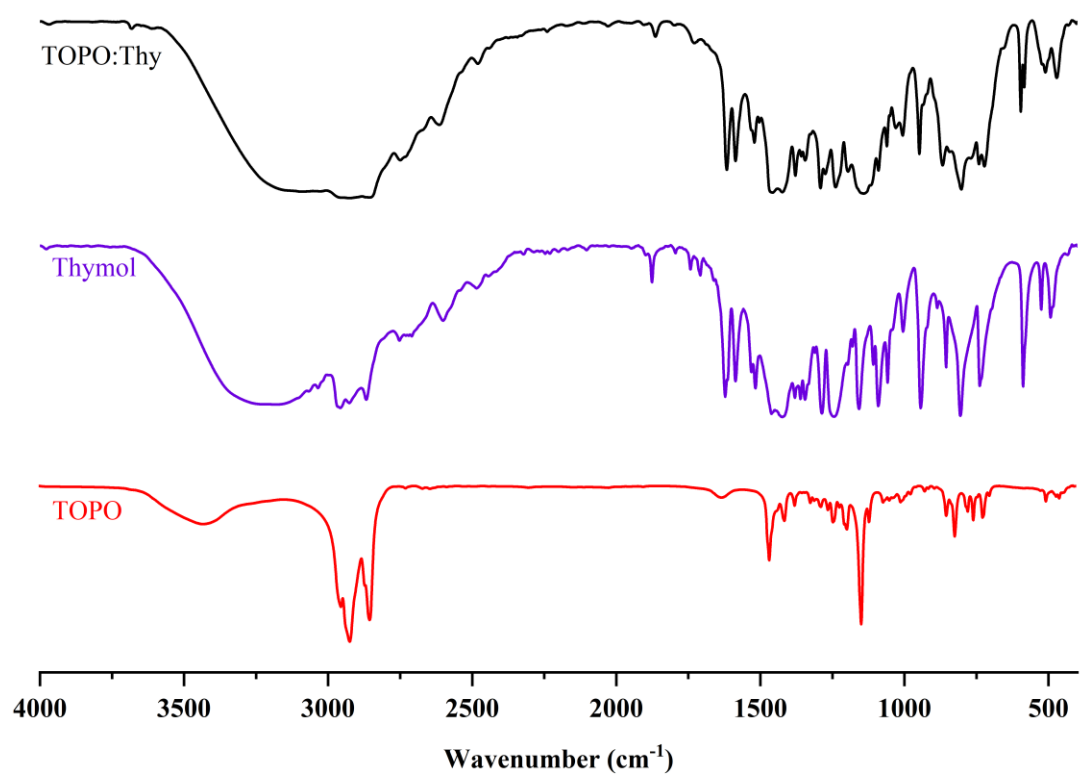

Figure S7. FTIR analysis of TOPO:Thy HDES and its individual components.

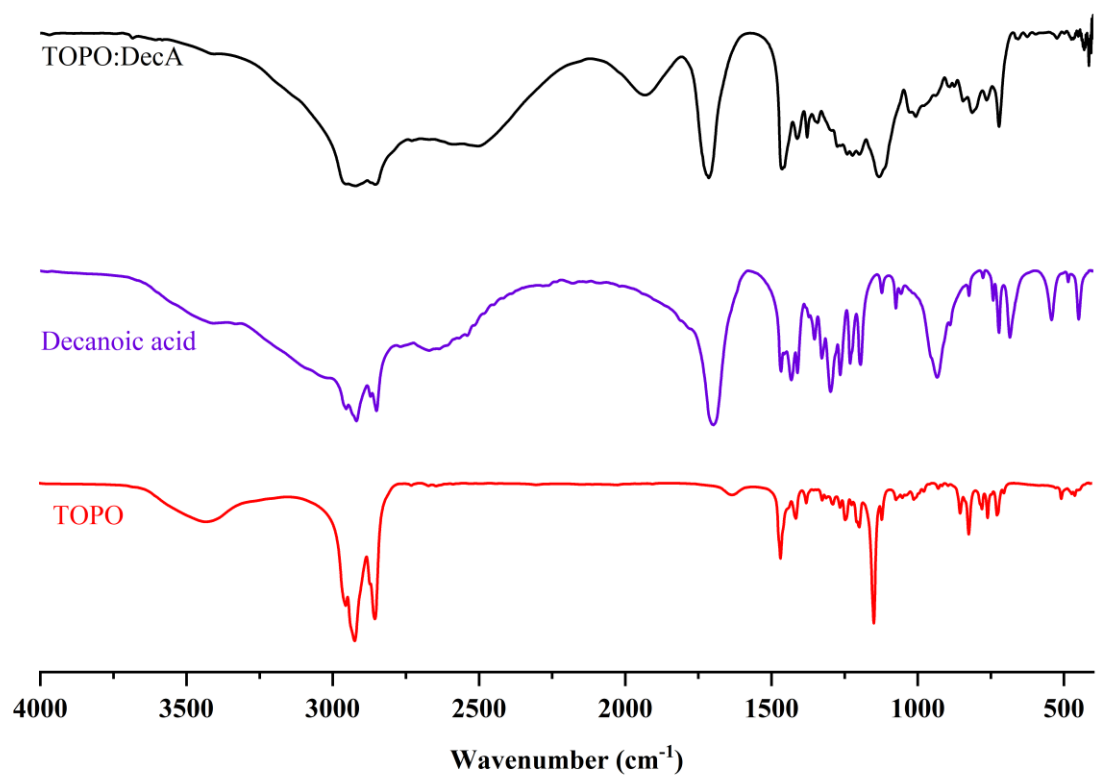

Figure S8. FTIR analysis of TOPO:DecA HDES and its individual components.

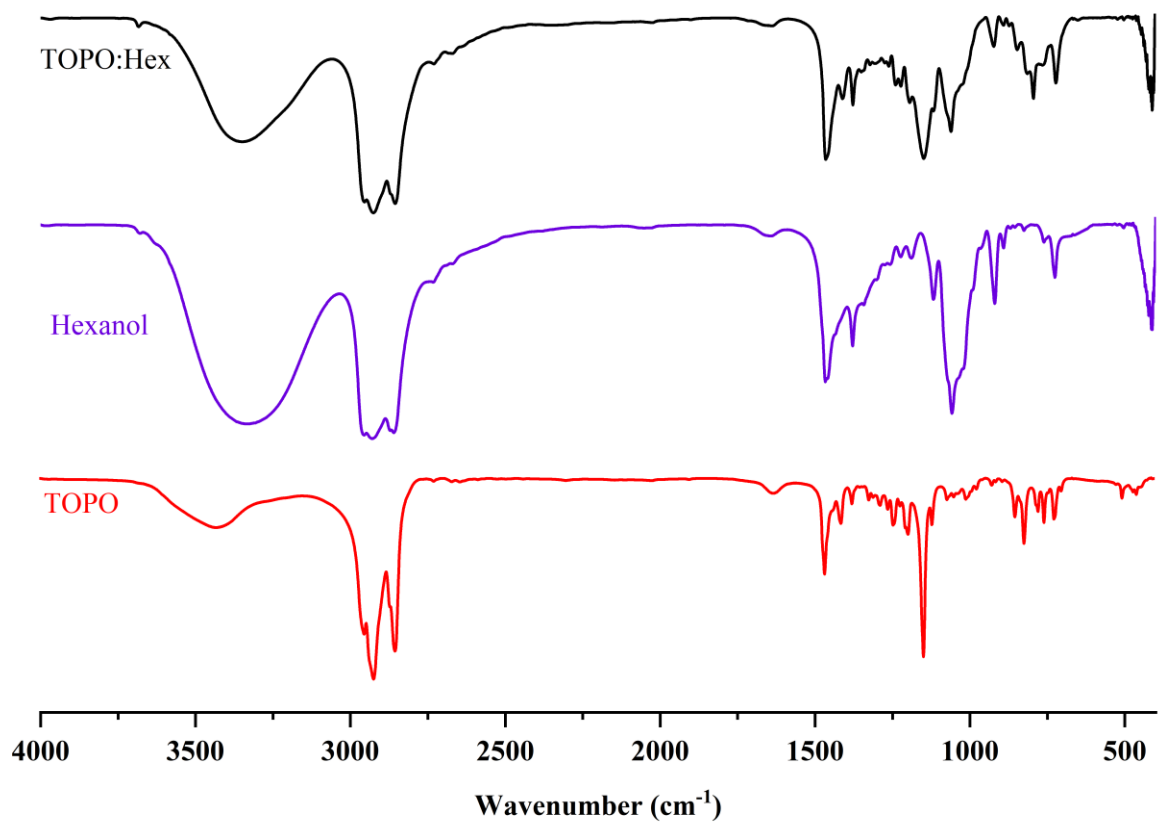

Figure S9. FTIR analysis of TOPO:Hex HDES and its individual components.

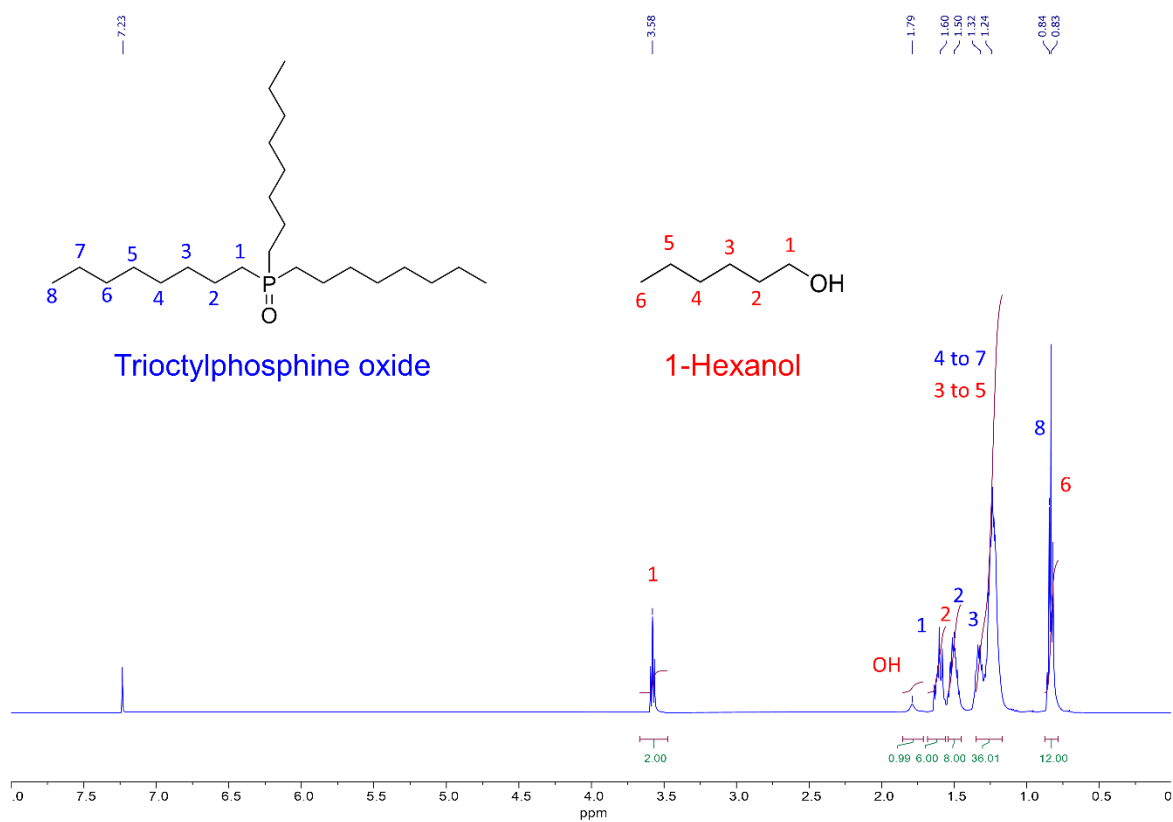

Figure S10.  $^1\text{H}$  NMR spectra of TOPO:Hex HDES. The peak around 7.25 is the peak of chloroform.

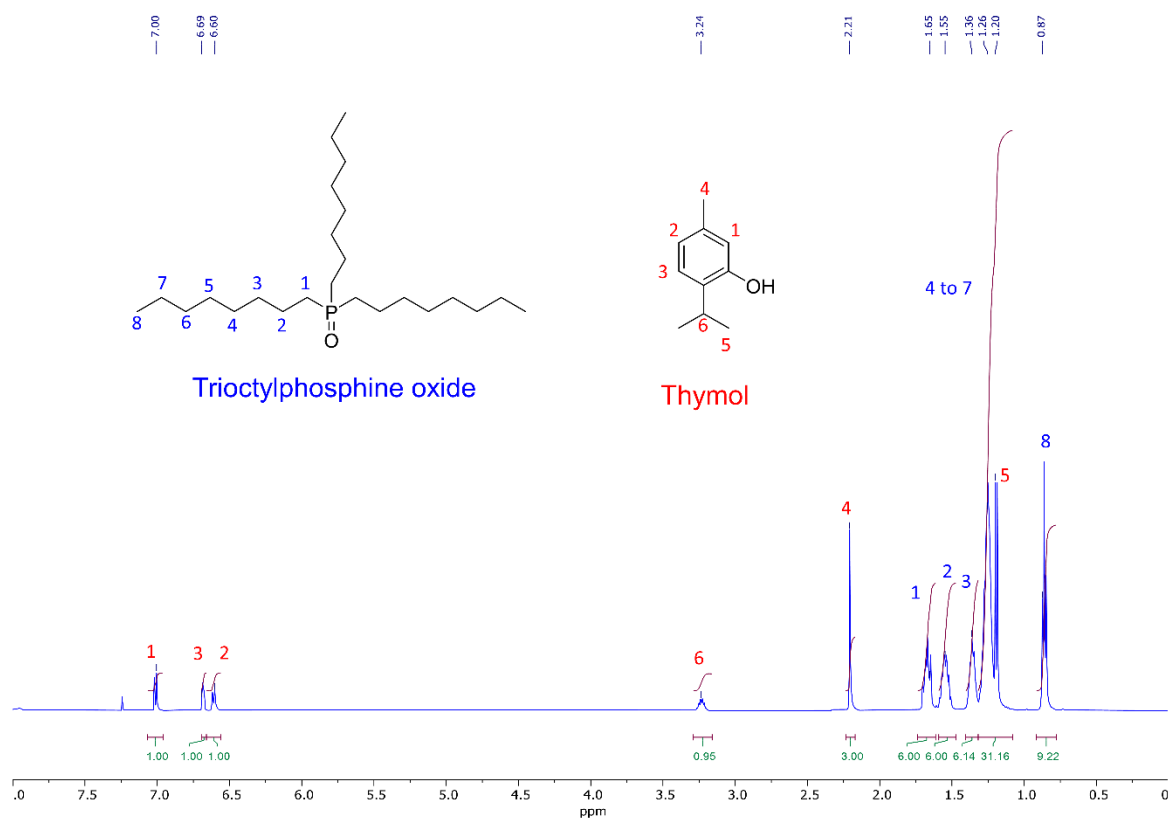

Figure S11.  $^1\text{H}$  NMR spectra of TOPO:Thy HDES. The peak around 7.25 is the peak of chloroform.



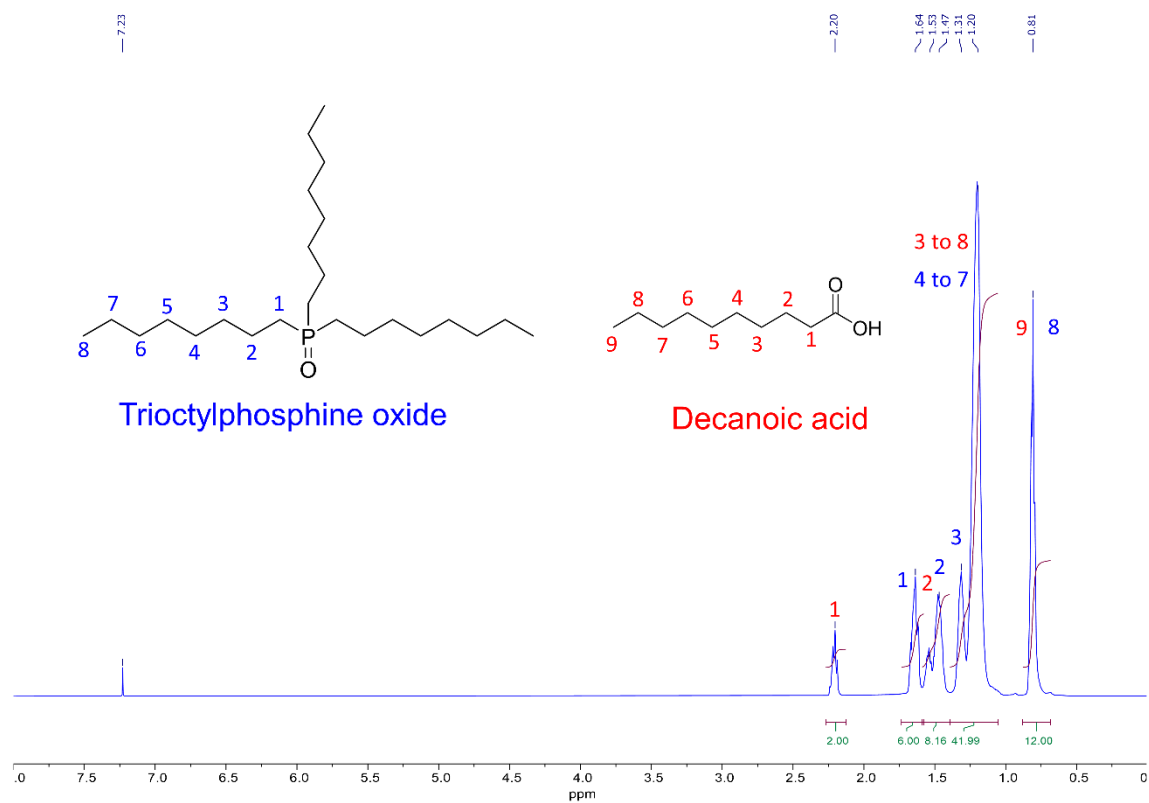

Figure S12.  $^1\text{H}$  NMR spectra of TOPO:DecA HDES. The peak around 7.25 is the peak of chloroform.

## References:

1. Neti, N.; Singh, J.; Misra, R.; Nandy, T., Liquid–liquid extraction of phenol from simulated sebacic acid wastewater. *Journal of Scientific and Industrial Research* **2009**, 68, 823–828.
2. Jiang, H.; Fang, Y.; Fu, Y.; Guo, Q.-X., Studies on the extraction of phenol in wastewater. *J. Hazard. Mater.* **2003**, 101, 179-190.
3. Zidi, C.; Tayeb, R.; Ali, M. B. S.; Dhahbi, M., Liquid–liquid extraction and transport across supported liquid membrane of phenol using tributyl phosphate. *Journal of Membrane Science* **2010**, 360, 334-340.
4. Liu, J.; Xie, J.; Ren, Z.; Zhang, W., Solvent extraction of phenol with cumene from wastewater. *Desalin. Water Treat.* **2013**, 51, 3826-3831.
5. Brinda Lakshmi, A.; Balasubramanian, A.; Venkatesan, S., Extraction of Phenol and Chlorophenols Using Ionic Liquid [Bmim]+[BF<sub>4</sub>]<sup>-</sup> Dissolved in Tributyl Phosphate. *CLEAN – Soil, Air, Water* **2013**, 41, 349-355.
6. Thasneema, K. K.; Dipin, T.; Thayyil, M. S.; Sahu, P. K.; Messali, M.; Rosalin, T.; Elyas, K. K.; Saharuba, P. M.; Anjitha, T.; Hadda, T. B., Removal of toxic heavy metals, phenolic compounds and textile dyes from industrial waste water using phosphonium based ionic liquids. *Journal of Molecular Liquids* **2021**, 323, 114645.
7. Xu, X.; Li, A.; Zhang, T.; Zhang, L.; Xu, D.; Gao, J.; Wang, Y., Efficient extraction of phenol from low-temperature coal tar model oil via imidazolium-based ionic liquid and mechanism analysis. *Journal of Molecular Liquids* **2020**, 306, 112911.
8. Ji, Y.; Hou, Y.; Ren, S.; Yao, C.; Wu, W., Tetraethylammonium amino acid ionic liquids and CO<sub>2</sub> for separation of phenols from oil mixtures. *Energy Fuels* **2018**, 32, 11046-11054.
9. Adeyemi, I.; Sulaiman, R.; Almazroui, M.; Al-Hammadi, A.; AlNashef, I. M., Removal of chlorophenols from aqueous media with hydrophobic deep eutectic solvents: Experimental study and COSMO RS evaluation. *Journal of Molecular Liquids* **2020**, 311, 113180.
10. An, Y.; Ma, W.; Row, K. H., Preconcentration and Determination of Chlorophenols in Wastewater with Dispersive Liquid–Liquid Microextraction Using Hydrophobic Deep Eutectic Solvents. *Analytical Letters* **2020**, 53, 262-272.
11. Sas, O. G.; Castro, M.; Domínguez, Á.; González, B., Removing phenolic pollutants using Deep Eutectic Solvents. *Separation and Purification Technology* **2019**, 227, 115703.
